# Supplementary material for: Stress management strategies and controlling emotion among Polish nurses and midwives who suffer COVID: cross-sectional study
Source: PeerJ journal article supplement (doi:10.7717/peerj.19816), 2025-09-22
Supplement: Coping_Inventory.pdf [file Coping_Inventory.pdf]

[illegible]

ANSWER HERE

ANSWER HERE



| Item No. | Coping Mechanism                                         | Category | Scales     |   |   |   |           |
|----------|----------------------------------------------------------|----------|------------|---|---|---|-----------|
|          |                                                          |          | Not at All |   |   |   | Very Much |
| 1        | Take some time off and get away from the situation       | AO       | 1          | 2 | 3 | 4 | 5         |
| 2        | Focus on the problem and see how I can solve it          | TO       | 1          | 2 | 3 | 4 | 5         |
| 3        | Blame myself for having gotten into this situation       | EO       | 1          | 2 | 3 | 4 | 5         |
| 4        | Treat myself to a favorite food or snack                 | AO       | 1          | 2 | 3 | 4 | 5         |
| 5        | Feel anxious about not being able to cope                | EO       | 1          | 2 | 3 | 4 | 5         |
| 6        | Think about how I solved similar problems                | TO       | 1          | 2 | 3 | 4 | 5         |
| 7        | Visit a friend                                           | AO       | 1          | 2 | 3 | 4 | 5         |
| 8        | Determine a course of action and follow it               | TO       | 1          | 2 | 3 | 4 | 5         |
| 9        | Buy myself something                                     | AO       | 1          | 2 | 3 | 4 | 5         |
| 10       | Blame myself for being too emotional about the situation | EO       | 1          | 2 | 3 | 4 | 5         |
| 11       | Work to understand the situation                         | TO       | 1          | 2 | 3 | 4 | 5         |
| 12       | Become very upset                                        | EO       | 1          | 2 | 3 | 4 | 5         |
| 13       | Take corrective action immediately                       | TO       | 1          | 2 | 3 | 4 | 5         |
| 14       | Blame myself for not knowing what to do                  | EO       | 1          | 2 | 3 | 4 | 5         |
| 15       | Spend time with a special person                         | AO       | 1          | 2 | 3 | 4 | 5         |
| 16       | Think about the event and learn from my mistakes         | TO       | 1          | 2 | 3 | 4 | 5         |
| 17       | Wish that I could change what had happened or how I felt | EO       | 1          | 2 | 3 | 4 | 5         |
| 18       | Go out for a snack or meal                               | AO       | 1          | 2 | 3 | 4 | 5         |
| 19       | Analyze my problem before reacting                       | TO       | 1          | 2 | 3 | 4 | 5         |
| 20       | Focus on my general inadequacies                         | EO       | 1          | 2 | 3 | 4 | 5         |
| 21       | Phone a friend                                           | AO       | 1          | 2 | 3 | 4 | 5         |

## **Results and Comments**

Overall, research using the CISS supports the notion that task-oriented coping is associated with greater wellbeing and positive adjustment to stress, while emotion-oriented and avoidance-oriented coping tend to be associated with greater distress and maladaptive adjustment. These associations have been found across a wide variety of stressful circumstances, including among people coping with academic worries (Zeidner, 1994), eating disorders (Koff & Sangani, 1998), chronic disease (Hurt et al., 2011), desire to quit smoking (Naquin & Gilbert, 1996), and insomnia (Morin, Rodrigue, & Ivers, 2003).
