# Supplementary material for: Stress management strategies and controlling emotion among Polish nurses and midwives who suffer COVID: cross-sectional study
Source: PeerJ. 2025 Sep 22;13:e19816. doi: 10.7717/peerj.19816 (PMC12462688; doi:10.7717/peerj.19816)
Supplement: Supplemental Information 1 [file peerj-13-19816-s001.xlsx]

## Sheet: Arkusz1
Grupa	Lp	age [yers old]	sex	years of work	Place of work	Hospital's degree of reference	another place	degree of reference	Place of residence	COVID-19 pre-infection health assessment	course of the disease	Test with which Sars-CoV-2 infection was confirmed	Cough	Fever	Shortness of breath/ difficulty breathing	Olfactory disorders	Taste disorders	Loss of appetite	Diarrhea	Shivers	Myalgia (muscle pain)	Nausea and vomiting	Headache	Sore throat	Conjunctivitis	Irritability	Confusion	Memory problems	Skin rash	Discoloration of fingers and toes	Anxiety	Depressive states	Sleep disorders	Neurological disorders	hospitalization due to covid-19	Czy ktoś z rodziny zachorował na Covid-19	Kogo	Complications of COVID-19: Fatigue	Shortness of breath	Cough	Joint pains	Chest pain	Lower mood	Muscle pains	Headaches	Dizziness	Recurrent fever	Heart palpitations	Loss of smell
midwife	1	51	K	29	1	1	0	0	2	4	2	2	1	1	0	1	1	1	0	0	1	0	1	1	0	0	0	0	0	0	0	0	1	0	0	0	0	0	0	0	0	0	1	0	0	0	0	1	0
midwife	2	47	K	25	1	1	0	0	3	4	2	4	1	0	0	0	1	1	0	0	1	0	1	1	0	0	0	0	0	0	0	0	0	0	0	0	0	1	0	1	1	0	1	0	0	0	0	0	0
midwife	3	27	k	4	1	1	0	0	3	5	2	3	0	0	0	1	1	0	0	0	1	0	1	0	0	0	0	0	0	0	0	0	1	0	0	1	dziadkowie	1	1	0	0	0	0	0	0	0	0	1	0
midwife	4	25	k	2	1	1	0	0	3	4	2	1	0	1	1	0	0	1	0	1	0	1	1	1	0	0	0	0	0	0	0	0	1	0	0	1	rodzice , rodzeństwo	1	0	0	0	0	0	0	0	0	0	0	0
midwife	5	40	k	15	1	1	0	0	2	4	2	2	1	1	0	1	1	0	0	0	0	0	1	0	0	0	0	0	0	0	1	0	1	0	0	1	dzieci	1	0	0	0	0	0	0	0	1	0	0	0
midwife	6	48	k	21	1	1	0	0	3	2	2	4	0	0	0	0	0	1	0	1	1	0	1	1	0	0	0	0	0	0	0	0	0	0	0	1	dzieci	1	0	0	0	0	0	0	0	0	0	0	0
midwife	7	50	k	27	1	2	0	0	2	5	3	2	1	1	1	1	1	1	1	1	1	0	1	0	0	0	0	0	0	0	0	0	0	0	0	1	dzieci, rodzeństwo	1	0	0	0	0	0	0	0	0	0	0	0
midwife	8	44	k	20	1	2	0	0	3	3	2	2	0	0	0	1	1	1	0	0	0	0	1	1	0	0	0	0	0	0	0	0	0	0	0	0	0	1	1	1	0	0	0	0	1	0	0	0	1
midwife	9	51	k	26	1	3	0	0	2	3	2	2	1	1	0	1	1	1	0	0	0	0	1	0	0	1	1	1	0	0	0	0	1	0	0	1	dzieci	1	1	1	0	0	0	1	0	1	0	0	0
midwife	10	43	k	18	1	2	0	0	3	4	2	4	1	0	0	1	1	0	0	1	1	0	1	0	0	0	0	0	0	0	0	0	0	0	0	0	0	0	0	0	0	0	0	0	1	1	0	0	1
midwife	11	23	k	0.5	1	2	0	0	1	5	2	2	1	1	0	0	0	0	0	0	0	0	1	1	1	0	0	0	0	0	0	0	0	0	0	1	rodzice	0	0	0	0	0	0	0	1	0	0	0	0
midwife	12	58	k	36	1	2	0	0	2	4	2	1	1	0	0	0	0	0	0	0	0	0	1	1	0	0	0	1	0	0	0	0	1	0	0	1	dzieci	1	0	0	0	0	0	0	0	1	0	0	0
midwife	13	22	k	0.6	1	1	0	0	2	5	2	2	1	0	0	1	0	0	0	0	1	0	1	1	0	0	1	1	0	0	0	0	0	0	0	1	rodzice, rodzeństwo, dziadkowie	1	0	0	0	0	0	0	0	0	0	0	0
midwife	14	24	k	2	1	2	0	0	3	3	2	2	1	0	0	1	1	0	0	0	0	0	0	0	0	0	0	0	0	0	0	0	0	0	0	0	0	1	0	0	0	0	1	0	0	0	0	0	0
midwife	15	23	k	0.6	2	2	0	0	1	5	2	2	1	1	0	1	1	0	0	0	0	1	0	0	0	0	0	1	0	0	0	0	0	0	0	0	0	0	1	0	0	0	1	0	0	0	0	0	0
midwife	16	49	k	20	1	2	0	0	2	4	2	2	0	0	0	0	0	1	0	0	1	1	1	0	0	0	0	0	0	0	0	0	1	0	0	0	0	1	0	0	0	0	0	0	0	1	0	1	0
midwife	17	23	k	0.3	1	3	0	0	1	4	2	4	1	0	1	0	0	0	0	0	0	1	1	1	0	0	0	0	0	0	1	0	0	0	0	1	rodzeństwo	0	0	0	0	0	0	0	0	0	0	0	0
midwife	18	58	k	38	1	2	0	0	2	4	2	2	1	1	1	1	1	1	0	0	1	0	1	0	0	0	1	0	0	0	1	0	0	0	0	0	0	1	1	0	1	1	0	1	1	0	0	1	0
midwife	19	22	k	0.6	1	3	0	0	3	5	2	2	0	0	0	0	0	0	0	1	1	0	1	0	0	0	0	0	0	0	0	0	0	0	0	1	rodzice	1	0	0	0	0	0	0	1	0	0	0	0
midwife	20	43	k	21	1	3	0	0	1	4	3	4	1	1	1	1	0	0	0	0	1	0	1	0	0	0	0	0	0	0	0	0	0	0	0	1	rodzice, mąż	1	1	1	1	1	0	1	1	0	0	0	0
midwife	21	22	k	0.8	2	1	0	0	3	2	2	2	1	0	0	1	1	1	1	1	0	0	1	0	0	0	1	0	0	0	1	0	1	0	0	1	rodzice	0	0	0	0	0	0	0	0	0	0	0	0
midwife	22	43	k	20	1	2	0	0	3	4	2	3	0	0	0	1	1	0	0	0	0	0	0	0	0	0	0	0	0	0	0	0	0	0	0	1	dzieci	0	0	0	1	0	0	0	0	0	0	0	0
midwife	23	22	k	0.6	2	3	0	0	3	5	3	3	0	1	0	0	0	1	0	1	1	0	1	0	0	0	0	0	0	0	0	0	0	0	0	1	mama	1	0	0	0	0	0	0	1	0	0	0	0
midwife	24	35	k	10	1	3	0	0	2	4	1	3	0	0	0	0	0	0	0	0	0	0	0	0	0	0	0	0	0	0	0	0	0	0	0	0	0	0	0	0	0	0	0	0	1	0	0	0	0
midwife	25	22	k	0.4	1	1	0	0	3	4	2	4	0	0	0	1	1	0	0	0	0	0	1	0	0	0	0	0	0	0	0	0	0	0	0	1	rodzice	0	0	0	0	0	0	0	0	0	0	0	0
midwife	26	42	k	19	1	3	0	0	1	2	2	2	1	1	1	0	0	0	0	1	0	0	1	0	0	0	0	1	1	0	0	0	0	0	0	1	dzieci, rodzice	1	1	1	0	0	1	0	0	0	0	0	0
midwife	27	22	k	0.4	2	1	0	0	3	5	2	4	0	0	0	1	1	0	0	0	0	0	0	0	0	0	0	0	0	0	0	0	0	0	0	0	0	1	0	0	0	0	0	0	0	0	0	0	0
midwife	28	53	k	23	1	2	0	0	2	3	2	2	1	1	1	0	0	1	1	1	0	1	1	1	0	0	0	1	0	0	1	0	0	0	0	1	dzieci	1	0	1	1	0	1	0	0	1	0	0	0
midwife	29	23	k	0.2	2	1	0	0	3	4	2	4	0	1	0	0	0	1	0	0	1	0	0	0	0	0	0	0	0	0	0	0	0	0	0	1	rodzice, rodzeństwo,	1	0	0	0	0	0	0	0	0	0	0	0
midwife	30	27	k	3	1	2	0	0	3	5	2	2	1	1	1	1	1	1	0	1	0	0	1	0	0	0	0	0	0	0	0	0	1	0	0	1	rodzice	1	0	1	0	0	1	0	0	0	0	0	0
midwife	31	21	k	0	0	0	0	0	1	3	2	2	1	1	1	1	1	1	0	1	1	0	1	0	0	0	0	0	1	0	0	0	1	0	0	1	rodzeństwo	1	0	0	0	0	0	0	0	0	0	0	0
midwife	32	40	k	15	1	2	0	0	2	3	1	2	0	0	0	0	0	0	0	0	0	0	0	0	0	0	0	0	0	0	1	0	0	0	0	0	0	1	0	0	0	0	1	0	0	0	0	0	0
midwife	33	22	k	0.6	2	1	0	0	3	3	2	3	1	0	1	1	1	1	0	0	1	1	1	0	0	1	0	0	0	0	1	1	0	0	0	1	rodzice	1	1	1	0	0	0	0	0	0	0	1	0
midwife	34	50	k	25	1	2	0	0	2	3	2	2	1	0	0	1	1	1	0	1	0	0	1	0	0	0	0	0	0	0	1	0	1	0	0	0	0	1	0	1	0	0	1	0	0	0	0	0	0
midwife	35	22	k	0.1	2	1	0	0	3	5	2	2	0	0	0	1	1	0	0	0	1	0	1	0	0	0	0	0	0	0	0	0	0	0	0	0	0	1	0	0	0	0	0	0	0	0	0	0	0
midwife	36	24	K	2	1	2	0	0	3	4	1	2	0	0	0	0	0	0	0	0	0	0	0	0	0	0	0	0	0	0	1	0	1	0	0	1	DZIADKOWIE	1	0	0	0	0	1	0	1	0	0	0	0
midwife	37	24	K	0.1	1	2	0	0	3	5	2	2	0	1	0	1	1	0	1	1	1	1	1	1	0	1	0	1	0	0	0	0	0	0	0	0	0	1	0	0	0	0	0	0	0	0	0	0	0
midwife	38	55	K	32	1	2	0	0	2	5	2	2	1	1	1	1	1	1	1	0	1	1	1	1	0	0	0	1	0	0	1	1	1	0	0	1	DZIECI, RODZICE	1	1	0	0	0	1	0	0	0	0	1	0
midwife	39	23	K	0.6	1	1	2	1	3	5	2	1	0	0	1	1	1	1	0	0	1	0	1	0	0	0	0	0	0	0	0	0	0	0	0	1	BABCIA	1	0	0	0	0	0	0	0	0	0	1	0
midwife	40	46	k	20	1	1	0	0	3	3	3	4	0	0	1	1	1	0	0	1	1	0	1	1	0	0	1	1	0	0	1	1	1	0	0	0	0	1	1	0	0	1	1	1	1	1	0	0	1
midwife	41	23	k	0.5	1	2	0	0	3	5	2	1	1	0	1	1	1	0	0	1	1	0	1	1	0	0	0	1	0	0	1	0	0	0	0	1	dziadkowie	0	0	0	0	0	0	0	0	0	0	1	0
midwife	42	23	k	0.2	2	1	0	0	3	5	2	2	1	1	0	1	1	1	0	0	0	0	0	0	0	0	0	1	0	0	0	0	0	1	0	1	rodzice	0	0	0	0	0	0	0	0	0	0	0	1
midwife	43	22	k	0.1	2	1	0	0	3	5	2	2	0	0	0	1	0	0	0	1	1	0	1	0	0	0	0	0	0	0	0	0	0	0	0	1	rodzeństwo	0	0	0	0	0	0	0	0	0	0	0	1
midwife	44	46	k	10	2	2	0	0	2	4	1	3	0	0	0	0	0	0	0	0	0	0	0	0	0	0	0	0	0	0	0	0	0	0	0	1	córka	0	0	0	0	0	0	0	0	0	0	0	0
midwife	45	22	k	0.1	1	3	0	0	1	4	2	1	1	1	0	1	1	1	0	0	0	0	1	0	0	0	0	0	0	0	0	0	1	0	0	0	0	0	0	0	0	0	0	0	1	0	0	0	1
midwife	46	25	k	2	2	1	0	0	1	5	2	4	0	0	0	1	1	0	0	0	0	0	0	0	0	1	0	0	0	0	1	0	0	0	0	1	rodzice	1	0	0	0	0	0	0	0	0	0	0	0
midwife	47	22	k	0.1	1	2	0	0	2	5	2	1	0	0	0	1	1	1	0	0	0	0	1	0	0	0	0	0	0	0	0	0	1	0	0	1	rodzice, rodzeństwo, dziadkowie	0	0	0	0	0	0	0	0	0	0	0	0
midwife	48	59	k	36	2	1	0	0	3	2	2	2	1	1	1	0	0	0	0	0	0	0	0	0	0	0	0	0	0	0	0	0	0	0	0	0	0	0	1	1	0	0	0	0	0	0	0	0	0
midwife	49	23	k	0.1	2	1	0	0	3	4	2	2	0	0	0	0	1	1	0	0	0	0	0	0	0	0	0	0	0	0	0	0	0	0	0	0	0	0	0	0	0	0	0	0	0	0	0	0	0
midwife	50	50	k	20	2	1	0	0	3	5	2	2	1	1	1	1	1	0	0	0	0	0	0	0	0	0	0	0	0	0	0	0	1	0	0	1	mąż	1	0	0	0	0	0	0	0	0	0	0	0
midwife	51	22	k	0	0	0	0	0	2	5	2	4	1	0	0	1	1	0	1	1	1	1	1	1	0	0	0	0	0	0	0	0	0	0	0	1	dziadkowie	0	0	0	0	0	0	0	1	0	0	0	0
midwife	52	46	k	14	1	2	0	0	3	4	2	4	0	0	0	1	1	1	0	1	1	0	1	0	0	0	0	1	0	0	0	0	0	0	0	1	rodzice	1	0	0	0	0	0	0	1	0	0	0	0
midwife	53	22	k	0	0	0	0	0	2	4	2	4	1	0	1	1	1	0	0	0	0	0	0	0	0	0	0	0	0	0	0	0	0	0	0	1	rodzeństwo	0	0	0	1	0	0	0	0	0	0	0	0
midwife	54	49	k	26	2	1	0	0	2	4	1	3	0	0	0	0	0	0	0	0	0	0	0	0	0	0	0	0	0	0	0	0	0	0	0	0	0	0	0	0	0	0	0	0	0	0	0	0	0
midwife	55	23	k	0	0	0	0	0	2	5	2	4	0	1	0	1	0	0	0	1	0	0	0	0	0	0	0	0	0	0	0	0	0	0	0	1	rodzice	0	0	0	0	0	0	0	0	0	0	0	0
midwife	56	50	k	27	1	2	0	0	1	4	2	1	0	0	0	1	1	1	0	1	1	0	1	1	0	0	0	0	0	0	0	0	0	0	0	1	mąż	1	0	0	0	0	1	0	0	0	0	0	0
midwife	57	65	k	42	1	2	0	0	2	2	2	2	0	0	1	1	1	1	0	0	0	0	0	0	0	0	1	1	0	0	1	0	1	0	0	0	0	1	0	0	0	0	0	0	0	0	0	0	0
midwife	58	58	k	35	1	2	0	0	3	4	3	1	1	1	0	0	0	1	0	1	1	0	1	0	1	0	0	0	1	0	0	0	0	0	0	0	1	0	0	1	0	0	0	0	0	0	0	0	0
midwife	59	35	k	9	1	2	0	0	3	5	2	4	0	0	0	1	1	0	0	0	0	0	0	0	0	0	0	1	0	0	0	0	0	0	0	1	mąż	0	0	0	0	0	0	0	0	0	0	0	0
midwife	60	58	k	35	1	2	0	0	2	4	2	2	0	1	0	0	0	0	0	1	1	0	0	0	0	1	0	0	0	0	1	0	1	0	0	1	rodzeństwo	1	0	0	1	0	0	0	0	0	0	0	0
midwife	61	28	k	5	1	2	0	0	3	3	5	2	2	0	0	1	1	1	0	0	0	1	0	0	0	0	0	1	0	0	0	0	0	0	0	0	0	0	0	0	0	0	0	0	1	0	0	0	1
midwife	62	29	k	6	1	2	0	0	3	3	2	4	1	1	1	1	1	1	0	1	0	1	1	1	0	1	0	1	0	0	0	0	1	0	0	1	mąż	1	0	0	0	0	1	0	0	0	0	1	0
midwife	63	59	k	37	1	1	0	0	2	4	2	4	0	0	0	0	1	1	0	0	1	1	0	0	0	0	0	1	0	0	0	0	1	0	0	1	maż	1	0	0	0	0	0	0	0	0	0	0	0
midwife	64	52	k	30	1	2	0	0	2	2	2	2	0	1	0	1	1	0	0	0	1	0	1	0	0	0	0	0	0	0	0	0	0	0	0	1	rodzice	1	0	0	0	0	0	0	0	0	0	0	0
midwife	65	22	k	0	0	0	0	0	3	5	2	4	1	1	0	0	1	0	0	0	1	0	1	0	0	0	0	0	0	0	0	0	0	0	0	1	rodziace, rodzeństwo	1	0	0	0	0	0	0	0	0	0	0	0
midwife	66	49	k	20	1	2	0	0	2	4	3	2	1	1	0	0	0	1	0	1	1	1	1	0	0	0	0	0	0	0	0	0	0	0	0	1	mąż	1	0	0	0	0	0	1	0	0	0	0	0
midwife	67	62	k	36	1	2	0	0	2	4	2	2	0	0	0	0	0	0	0	0	0	0	0	1	0	0	0	0	0	0	0	0	0	0	0	0	0	0	0	0	0	0	0	0	0	0	0	0	0
midwife	68	22	k	0.6	1	1	0	0	2	5	1	2	0	0	0	0	0	0	0	0	0	0	0	0	0	0	0	0	0	0	0	0	0	0	0	0	0	0	0	0	0	0	0	0	0	0	0	0	0
midwife	69	50	k	14	1	2	0	0	3	5	2	4	0	0	0	1	1	0	0	1	1	0	1	1	0	1	0	1	0	0	0	0	1	0	0	1	dzieci, rodzeństwo	1	0	0	0	0	0	0	1	1	0	1	1
midwife	70	24	k	2	1	1	0	0	1	4	2	2	1	0	0	1	0	0	0	1	1	0	0	1	0	0	0	0	0	0	0	0	0	0	0	0	0	0	0	0	0	0	0	0	0	0	0	0	0
midwife	71	42	k	20	1	3	0	0	3	5	2	1	1	0	0	0	0	0	0	0	1	0	1	0	0	0	0	0	0	0	0	0	0	0	0	1	rodzice	0	0	0	0	0	0	0	0	0	0	0	0
midwife	72	28	k	4	1	2	0	0	2	5	2	2	1	1	0	0	0	0	0	1	0	0	1	0	0	0	0	0	0	0	0	0	0	0	0	1	rodzice	1	0	1	1	0	0	1	1	0	0	0	0
midwife	73	30	k	6	1	2	0	0	3	5	2	2	0	1	0	1	1	0	0	0	1	0	1	1	0	0	0	0	0	0	0	0	0	0	0	1	dzieci, mąż	1	0	0	0	0	0	0	0	0	0	0	0
midwife	74	23	k	0.3	1	2	0	0	2	5	2	1	0	0	0	1	1	1	0	0	0	0	1	0	0	0	0	0	0	0	0	0	0	0	0	1	rodzice, rodzeństwo, dziadkowie	1	0	0	0	0	0	0	0	0	0	0	0
midwife	75	55	k	35	1	2	0	0	3	3	2	2	0	1	0	0	0	1	0	0	1	0	1	1	0	0	0	0	0	0	0	1	1	0	0	1	dzieci	1	0	0	1	0	0	0	1	1	1	0	0
midwife	76	60	k	40	1	1	0	0	2	3	2	1	0	0	0	1	1	1	0	1	1	0	1	0	1	1	0	0	0	0	1	0	1	0	0	1	dzieci	1	0	0	1	0	1	1	0	1	0	1	0
midwife	77	46	k	20	1	2	0	0	2	4	2	4	0	0	0	1	1	1	1	1	1	0	1	0	0	1	0	1	0	0	0	1	0	0	0	1	dzieci	1	1	0	1	0	0	0	1	1	0	0	0
midwife	78	34	k	8	2	2	0	0	2	4	2	2	1	1	0	1	1	0	0	1	0	0	0	0	0	0	0	0	0	0	0	0	0	0	0	0	0	0	0	0	0	0	0	0	1	0	0	0	0
midwife	79	38	k	10	2	1	0	0	3	5	2	4	0	1	0	1	1	0	0	0	1	0	1	0	0	0	0	0	0	0	0	0	0	0	0	0	0	1	0	0	0	0	0	0	0	0	0	0	0
midwife	80	38	k	13	2	1	0	0	2	5	2	2	1	1	0	0	0	0	0	0	0	0	0	0	0	0	0	0	0	0	0	0	0	0	0	1	mąż	1	0	0	0	0	0	0	0	0	0	0	0
midwife	81	38	k	16	2	1	0	0	3	5	3	3	1	1	1	1	1	1	1	1	1	0	1	0	0	1	0	0	0	0	1	0	1	0	0	1	dzieci, rodzice	1	0	1	0	0	0	0	1	0	0	0	0
midwife	82	40	k	16	2	1	0	0	1	5	2	2	1	1	0	1	0	0	0	0	0	0	1	0	0	1	0	0	0	0	1	0	1	0	0	1	rodzice	1	0	1	0	0	0	0	0	0	0	1	0
midwife	83	33	k	8	1	2	0	0	3	5	3	4	1	1	1	1	1	1	0	1	1	1	1	1	1	1	1	1	0	0	1	1	1	0	0	1	dzieci, mąż	1	0	0	0	0	1	0	1	1	0	1	0
midwife	84	29	k	5	1	2	0	0	2	4	2	2	0	1	0	0	0	1	0	1	1	0	1	0	0	0	0	0	0	0	0	0	0	0	0	1	rodzice	1	0	0	0	0	1	0	0	0	0	0	0
midwife	85	45	k	20	1	2	0	0	3	5	2	2	0	0	0	1	0	0	0	0	0	0	0	0	0	0	0	0	0	0	0	0	0	0	0	1	dzieci, rodzice	1	0	0	0	0	0	0	0	0	0	0	0
midwife	86	47	k	22	1	2	0	0	2	3	2	2	0	0	0	1	1	0	0	0	0	0	1	0	0	0	0	0	0	0	0	0	0	0	0	1	dzieci	0	0	0	0	0	0	0	1	0	0	0	0
midwife	87	43	k	22	1	2	0	0	3	5	3	4	0	1	0	1	1	1	0	0	1	0	1	0	0	0	0	1	0	0	1	0	1	0	0	0	0	1	0	0	0	0	0	0	1	0	0	0	1
midwife	88	32	k	6	2	2	0	0	2	4	2	2	0	0	0	1	1	0	0	0	1	0	0	0	0	0	0	0	0	0	0	0	0	0	0	0	1	0	0	0	0	0	1	0	0	0	0	0	0
midwife	89	28	k	6	1	2	0	0	3	4	2	1	0	0	1	1	1	1	0	0	0	0	1	0	0	0	0	0	0	0	0	0	0	0	0	1	rodzice, rodzeństwo	1	1	0	0	0	0	0	0	0	0	0	0
midwife	90	24	k	1	2	1	0	0	3	5	2	2	0	0	0	1	0	0	0	0	0	0	0	0	0	0	0	0	0	0	1	0	1	0	0	1	rodzice	1	0	0	1	0	0	0	1	0	0	0	0
midwife	91	26	k	3	1	1	0	0	2	5	1	1	0	0	0	0	0	0	0	0	0	0	0	0	0	0	0	0	0	0	0	0	0	0	0	1	rodzice, rodzeństwo, dziadkowie	0	0	0	0	0	0	0	0	0	0	0	0
midwife	92	46	k	21	1	1	0	0	3	4	2	1	0	1	0	0	0	1	0	1	1	0	1	1	0	0	0	1	0	0	1	1	1	0	0	1	dzieci, rodzice	1	0	0	1	0	0	0	1	1	0	1	0
midwife	93	45	k	22	1	1	0	0	3	4	2	2	0	0	0	1	0	0	0	0	0	0	1	1	0	0	0	0	0	0	0	0	0	0	0	0	0	1	0	0	1	0	0	0	0	0	0	0	1
midwife	94	59	k	35	1	1	0	0	2	3	2	2	1	0	0	1	1	1	0	0	1	0	1	0	0	0	0	0	0	0	1	0	1	0	0	1	mąż	1	0	0	0	0	0	0	0	0	0	0	0
midwife	95	51	k	30	1	1	0	0	2	4	2	2	1	1	0	1	1	1	0	1	1	0	1	1	0	0	0	0	0	0	0	0	0	0	0	1	dzieci	0	0	0	0	0	1	0	0	0	0	1	0
midwife	96	48	k	20	1	1	0	0	2	4	2	2	1	1	0	0	0	0	0	0	0	0	0	0	0	0	0	0	0	0	0	0	0	0	0	0	0	0	0	0	0	0	0	0	0	0	0	0	0
nurse	1	34	m	8	1	2	0	0	2	4	2	2	1	1	0	0	0	0	0	0	0	0	1	0	0	0	0	0	0	0	0	0	1	0	0	1	rodzice, ordzeństwo	1	0	0	0	0	1	0	0	0	0	0	0
nurse	2	45	k	24	1	2	0	0	3	4	2	3	1	1	0	0	0	0	0	1	0	0	0	0	0	0	0	0	0	0	1	0	0	0	0	0	0	1	0	0	0	0	0	0	0	0	0	0	0
nurse	3	42	k	14	1	1	0	0	3	4	2	2	0	1	0	0	0	0	0	1	0	0	1	0	0	0	0	0	0	0	1	0	0	0	0	1	dzieci	1	0	0	0	0	0	0	0	0	0	0	0
nurse	4	34	k	12	1	2	0	0	3	5	2	3	0	0	0	1	1	1	0	1	1	0	1	1	0	0	0	0	1	0	0	0	0	0	0	0	0	0	0	0	0	0	0	0	0	1	0	0	0
nurse	5	29	k	1	2	0	0	0	2	4	2	1	1	0	0	0	0	0	0	0	0	0	0	1	0	0	0	1	0	0	1	0	0	0	0	1	rodzice, dziadkowie	1	0	0	0	0	0	0	0	0	0	1	0
nurse	6	25	k	2	1	1	0	0	3	5	2	2	0	1	0	1	1	0	0	0	0	0	1	0	0	0	0	1	0	0	0	0	0	0	0	1	rodzice, rodzeństwo	1	0	0	0	0	0	0	0	0	0	0	0
nurse	7	49	k	29	1	1	0	0	3	3	2	4	0	1	0	0	0	1	0	0	1	0	1	0	0	0	0	0	0	0	0	0	1	0	0	1	dzieci	1	0	0	0	0	1	0	0	0	0	1	0
nurse	8	54	k	20	1	1	0	0	2	5	1	2	0	0	0	0	0	0	0	0	0	0	0	0	0	0	0	0	0	0	0	0	0	0	0	0	0	0	0	0	0	0	0	0	0	0	0	0	0
nurse	9	31	k	7	1	1	0	0	2	4	2	2	1	1	0	0	0	0	0	0	0	0	0	0	0	0	0	1	0	0	0	0	0	0	0	0	0	1	0	0	0	0	0	0	0	0	0	0	0
nurse	10	37	k	8	1	1	0	0	3	5	2	2	0	0	0	1	1	0	0	0	0	0	0	0	0	0	0	0	0	0	0	0	0	0	0	1	dzieci, rodzice	0	0	0	1	0	0	0	0	0	0	0	0
nurse	11	25	k	2	1	1	0	0	2	4	2	2	0	0	0	1	1	0	0	1	0	0	0	0	0	0	0	0	0	0	0	0	0	0	0	0	0	0	0	0	0	0	0	0	0	0	0	0	0
nurse	12	38	m	13	1	1	0	0	3	2	2	4	0	0	0	1	1	0	0	0	0	0	1	0	0	0	0	0	0	0	0	0	1	0	0	1	dziadkowie	0	0	0	0	0	0	0	1	0	0	0	0
nurse	13	29	k	3	1	1	0	0	3	4	4	1	2	0	0	0	0	0	0	0	0	0	0	0	0	0	0	0	0	0	0	0	0	0	0	0	0	1	0	0	0	0	0	0	0	0	0	0	0
nurse	14	40	k	5	1	1	0	0	2	4	2	2	1	0	1	1	1	0	0	1	0	1	1	0	0	0	0	1	0	1	0	0	0	0	0	1	rodzice, mąż	1	0	0	0	0	0	0	0	1	0	0	0
nurse	15	44	k	20	1	2	0	0	2	5	2	2	1	0	1	1	1	1	0	0	1	0	1	0	0	1	0	1	0	0	1	0	0	0	0	1	dzieci	1	0	1	0	0	0	0	0	0	0	1	0
nurse	16	48	k	23	1	2	0	0	2	5	3	2	1	1	1	1	1	1	0	1	1	1	1	1	0	0	0	1	0	0	0	0	1	0	0	1	rodice	1	0	1	0	0	1	0	0	0	0	1	0
nurse	17	38	m	10	1	1	0	0	3	5	2	4	1	0	0	0	0	0	1	1	1	0	1	0	0	0	0	0	0	0	0	0	1	0	0	1	dziadkowie	0	0	1	0	0	0	0	1	0	0	0	0
nurse	18	32	k	5	1	2	0	0	3	5	2	4	1	0	0	0	0	1	0	1	0	0	1	0	0	1	0	0	0	0	0	0	1	0	0	1	dziadkowie	1	0	0	0	0	0	0	0	0	0	0	0
nurse	19	49	k	23	1	2	0	0	3	5	2	2	0	1	0	1	1	1	0	1	1	0	0	0	0	0	0	0	0	0	0	0	0	0	0	1	dzieci, rodzice, rodzeństwo	0	0	0	0	0	1	0	0	0	0	0	0
nurse	20	52	k	32	1	2	0	0	2	3	2	2	0	1	0	1	1	0	0	1	0	0	1	0	0	0	0	0	0	0	0	0	0	0	0	0	0	1	0	0	0	0	1	0	0	0	0	0	0
nurse	21	53	k	25	1	2	0	0	3	4	2	2	1	0	1	1	1	1	0	0	1	1	1	0	1	0	0	1	0	0	1	1	1	0	0	1	dzieci	1	0	0	0	0	0	1	1	0	0	1	0
nurse	22	29	m	5	1	1	0	0	3	5	2	2	1	0	0	1	0	1	0	0	0	0	0	0	0	0	0	0	0	0	0	0	0	0	0	1	rodzice	0	0	0	0	0	0	0	0	0	0	0	0
nurse	23	28	k	3	1	2	0	0	2	4	2	1	0	0	0	1	1	0	0	0	1	0	0	0	0	0	0	0	0	0	0	0	0	0	0	1	rodzice	1	0	0	0	0	0	1	0	0	0	0	0
nurse	24	26	k	2.5	1	2	0	0	3	5	2	2	0	0	0	1	1	0	0	0	0	0	0	0	0	0	0	0	0	0	0	0	0	0	0	0	0	1	0	0	0	0	0	0	0	0	0	0	0
nurse	25	24	k	2	1	2	0	0	3	4	1	2	0	0	0	0	0	0	0	0	0	0	0	0	0	0	0	0	0	0	0	0	0	0	0	1	rodzeństwo	0	0	0	0	0	0	0	0	0	0	0	0
nurse	26	27	k	5	2	1	0	0	3	5	2	4	0	1	0	1	1	1	0	0	1	0	1	0	0	0	0	0	0	0	0	0	0	0	0	1	rodzice, rodzeństwo	1	0	0	0	0	0	0	0	0	0	0	0
nurse	27	47	k	20	2	1	0	0	3	4	2	3	0	0	0	0	1	1	0	0	0	0	0	0	0	0	0	0	0	0	0	0	0	0	0	0	0	0	0	0	0	0	0	0	0	0	0	0	0
nurse	28	46	k	18	1	1	0	0	3	4	2	3	0	1	0	1	1	0	0	1	1	0	1	1	1	0	0	0	0	0	0	0	0	0	0	1	rodzice	1	0	0	0	0	0	0	0	0	0	0	0
nurse	29	50	k	10	1	1	0	0	3	5	2	1	1	0	0	1	0	0	0	0	0	0	0	0	0	0	0	0	0	0	0	0	0	0	0	0	0	0	0	0	0	0	0	0	0	0	0	0	0
nurse	30	37	k	12	1	1	0	0	3	4	2	3	0	0	0	0	0	0	0	0	1	0	1	0	0	0	0	0	0	0	0	0	0	0	0	0	0	0	0	0	0	0	0	0	0	0	0	0	0
nurse	31	50	k	20	2	1	0	0	3	4	3	1	1	0	1	1	1	1	0	0	0	0	1	1	0	0	0	0	0	0	0	0	1	0	0	1	dzieci, mąż	1	0	0	0	0	0	0	0	0	0	1	0
nurse	32	24	k	2	2	1	0	0	3	5	2	3	0	0	0	1	1	0	0	0	0	0	1	0	0	0	0	0	0	0	0	0	0	0	0	0	0	0	0	0	0	0	0	0	0	0	0	0	0
nurse	33	37	k	15	1	2	0	0	2	4	2	1	1	1	0	1	1	1	0	0	0	0	0	0	0	0	0	0	0	0	0	0	0	0	0	1	rodzice	0	0	0	0	0	0	0	0	0	0	0	0
nurse	34	47	k	22	1	2	0	0	3	5	3	4	1	1	1	1	1	1	0	1	1	0	1	0	0	1	0	1	0	0	0	0	1	0	0	1	dzieci	0	0	0	0	0	0	0	0	0	0	0	0
nurse	35	42	k	20	1	2	0	0	3	4	2	2	1	1	1	1	0	0	0	0	1	0	0	0	0	0	0	0	0	0	0	0	0	0	0	1	dzieci	1	1	0	0	0	1	0	0	0	0	0	0
nurse	36	50	k	25	1	1	0	0	1	5	2	4	0	0	1	0	1	1	0	0	0	0	0	0	0	1	0	0	0	0	1	0	0	0	0	0	0	0	0	0	0	0	0	0	0	0	0	0	0
nurse	37	42	k	21	1	2	0	0	3	3	2	3	0	0	0	0	1	0	0	0	0	0	1	0	0	0	0	0	0	0	0	0	0	0	0	1	dici,rodzice	0	0	0	1	0	1	0	0	0	0	0	0
nurse	38	49	k	20	1	2	0	0	3	5	2	4	1	0	0	1	0	0	0	0	0	0	1	0	0	0	0	0	0	0	1	0	0	0	0	1	dzieci	0	0	0	0	0	0	0	1	0	0	1	0
nurse	39	35	k	10	1	2	0	0	1	4	2	3	1	1	0	1	1	0	0	0	1	0	0	1	0	0	0	0	0	0	0	0	0	0	0	1	rodzice	1	0	0	0	0	1	0	0	0	0	0	0
nurse	40	34	m	6	1	2	0	0	2	4	3	2	1	0	1	0	0	0	0	1	1	0	1	1	0	0	0	0	0	0	0	0	0	0	0	0	0	0	1	1	0	0	0	0	0	0	0	0	0
nurse	41	53	k	30	1	1	0	0	1	4	2	3	0	0	0	0	0	0	1	0	0	0	1	0	0	0	0	0	0	0	1	0	0	0	0	1	rodzeństwo	1	0	0	1	0	0	0	1	0	0	0	0
[truncated: 57 more columns]
